# Supplementary material for: Carbohydrate Antigen 125 Is a Biomarker of the Severity and Prognosis of Pulmonary Hypertension
Source: PubMed Central journal article supplement (PMC8330972; doi:10.3389/fcvm.2021.699904), 2021-07-20

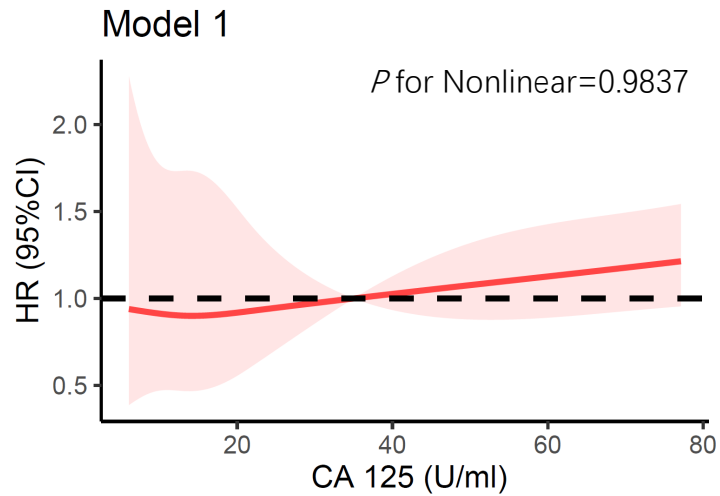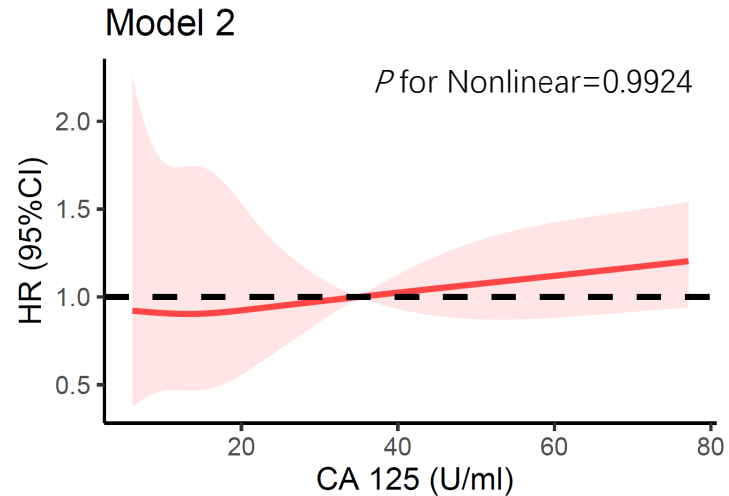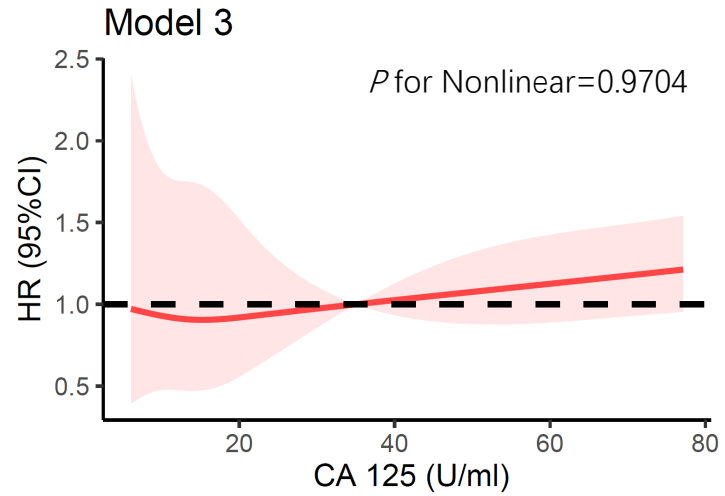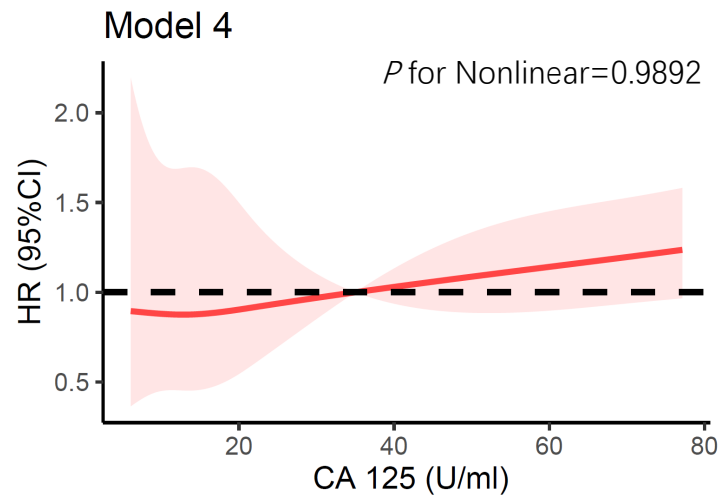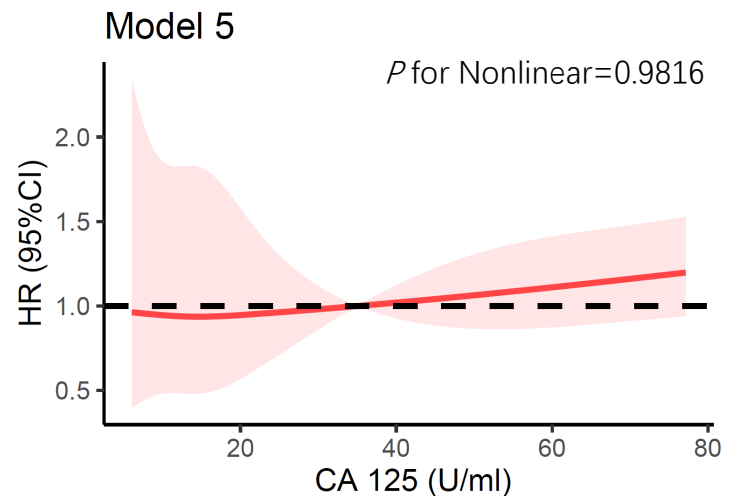

Supplement: Image_1.pdf [file Image_1.pdf]
